# Supplementary material
Source: Springer Nature journal article supplement (https://www.springermedizin.de/resource/supplementary/13256_2013_2643_MOESM1_ESM.pdf/9650174)
Supplement: MOESM1 [file 9650174]

# PATIENT 1

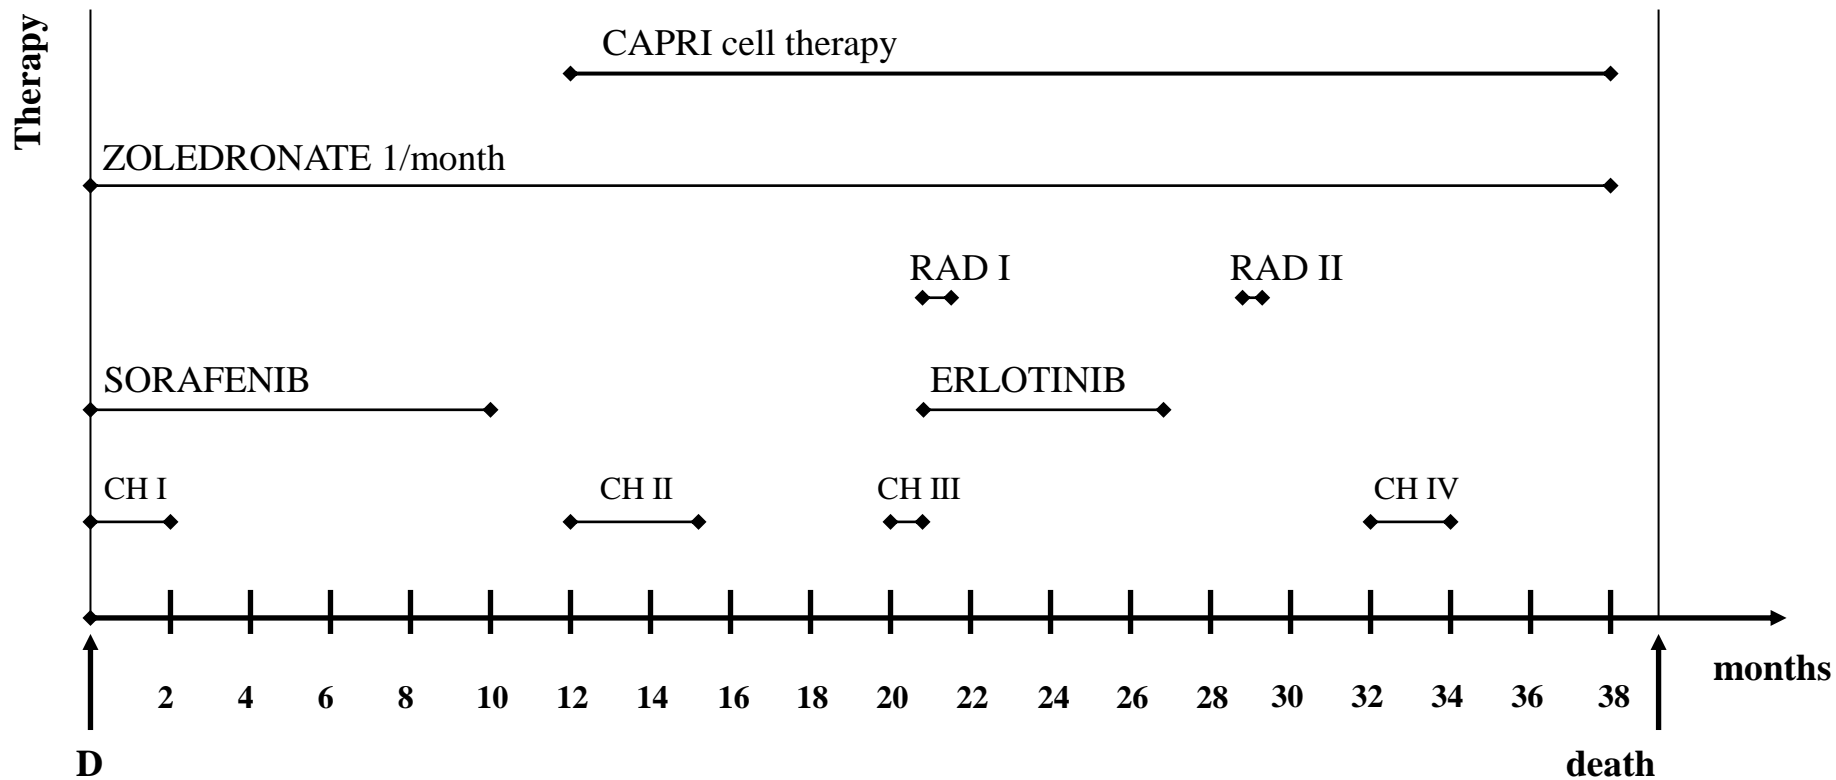

D = day of diagnosis  
CH I = chemotherapy I: paclitaxel, carboplatin,  
CH II = chemotherapy II: docetaxel,  
CH III = chemotherapy III: pemetrexed,  
CH IV = chemotherapy IV: vinorelbin,  
RAD I = radiation I: brain metastases with gamma knife 20/22Gy,  
RAD II = radiation II: spina iliaca superior 35Gy.
